# Supplementary material
Source: PubMed Central journal article supplement (PMC3738202)
Supplement: NIHMS252564-supplement-Sup_fig_and_tables.pdf [file NIHMS252564-supplement-Sup_fig_and_tables.pdf]

Supplemental Figure 1

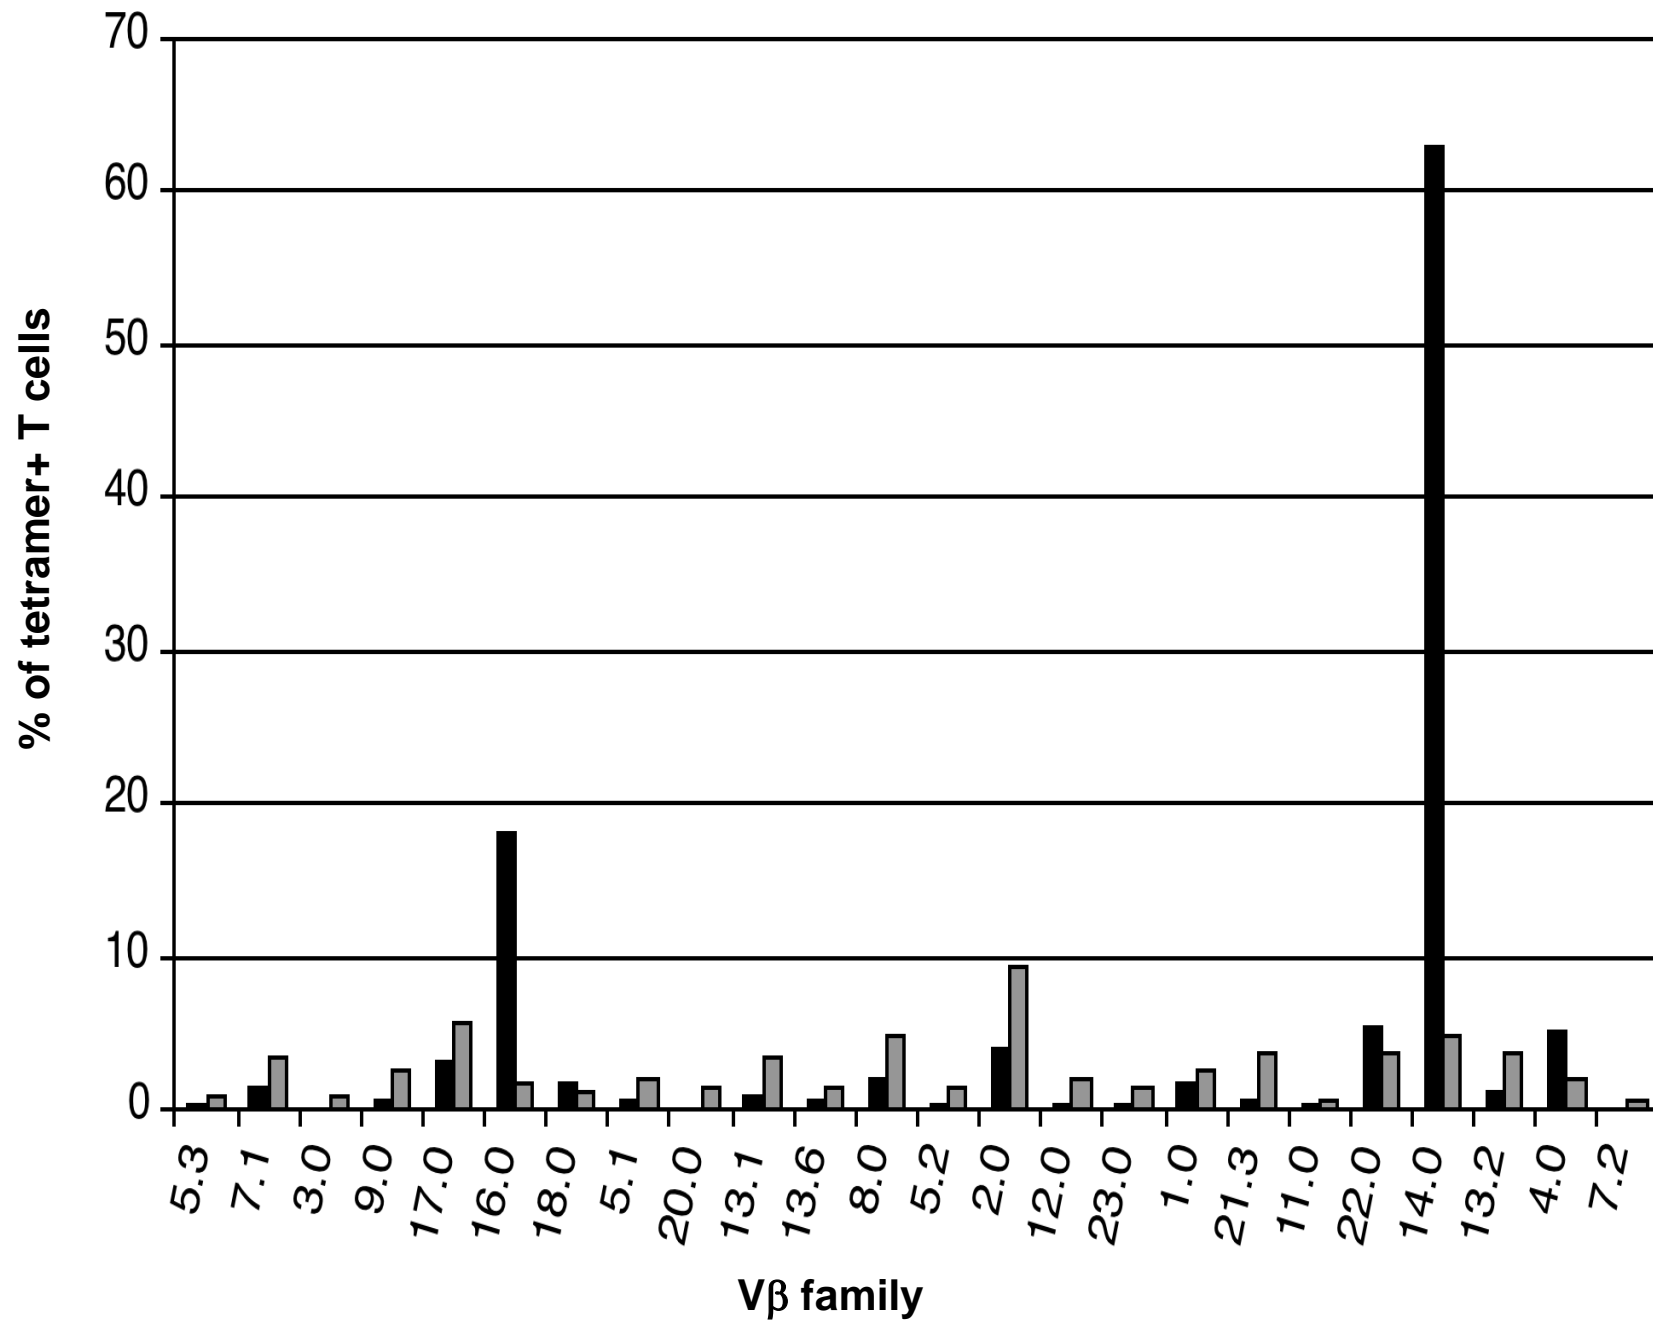

Supplemental Figure 2A

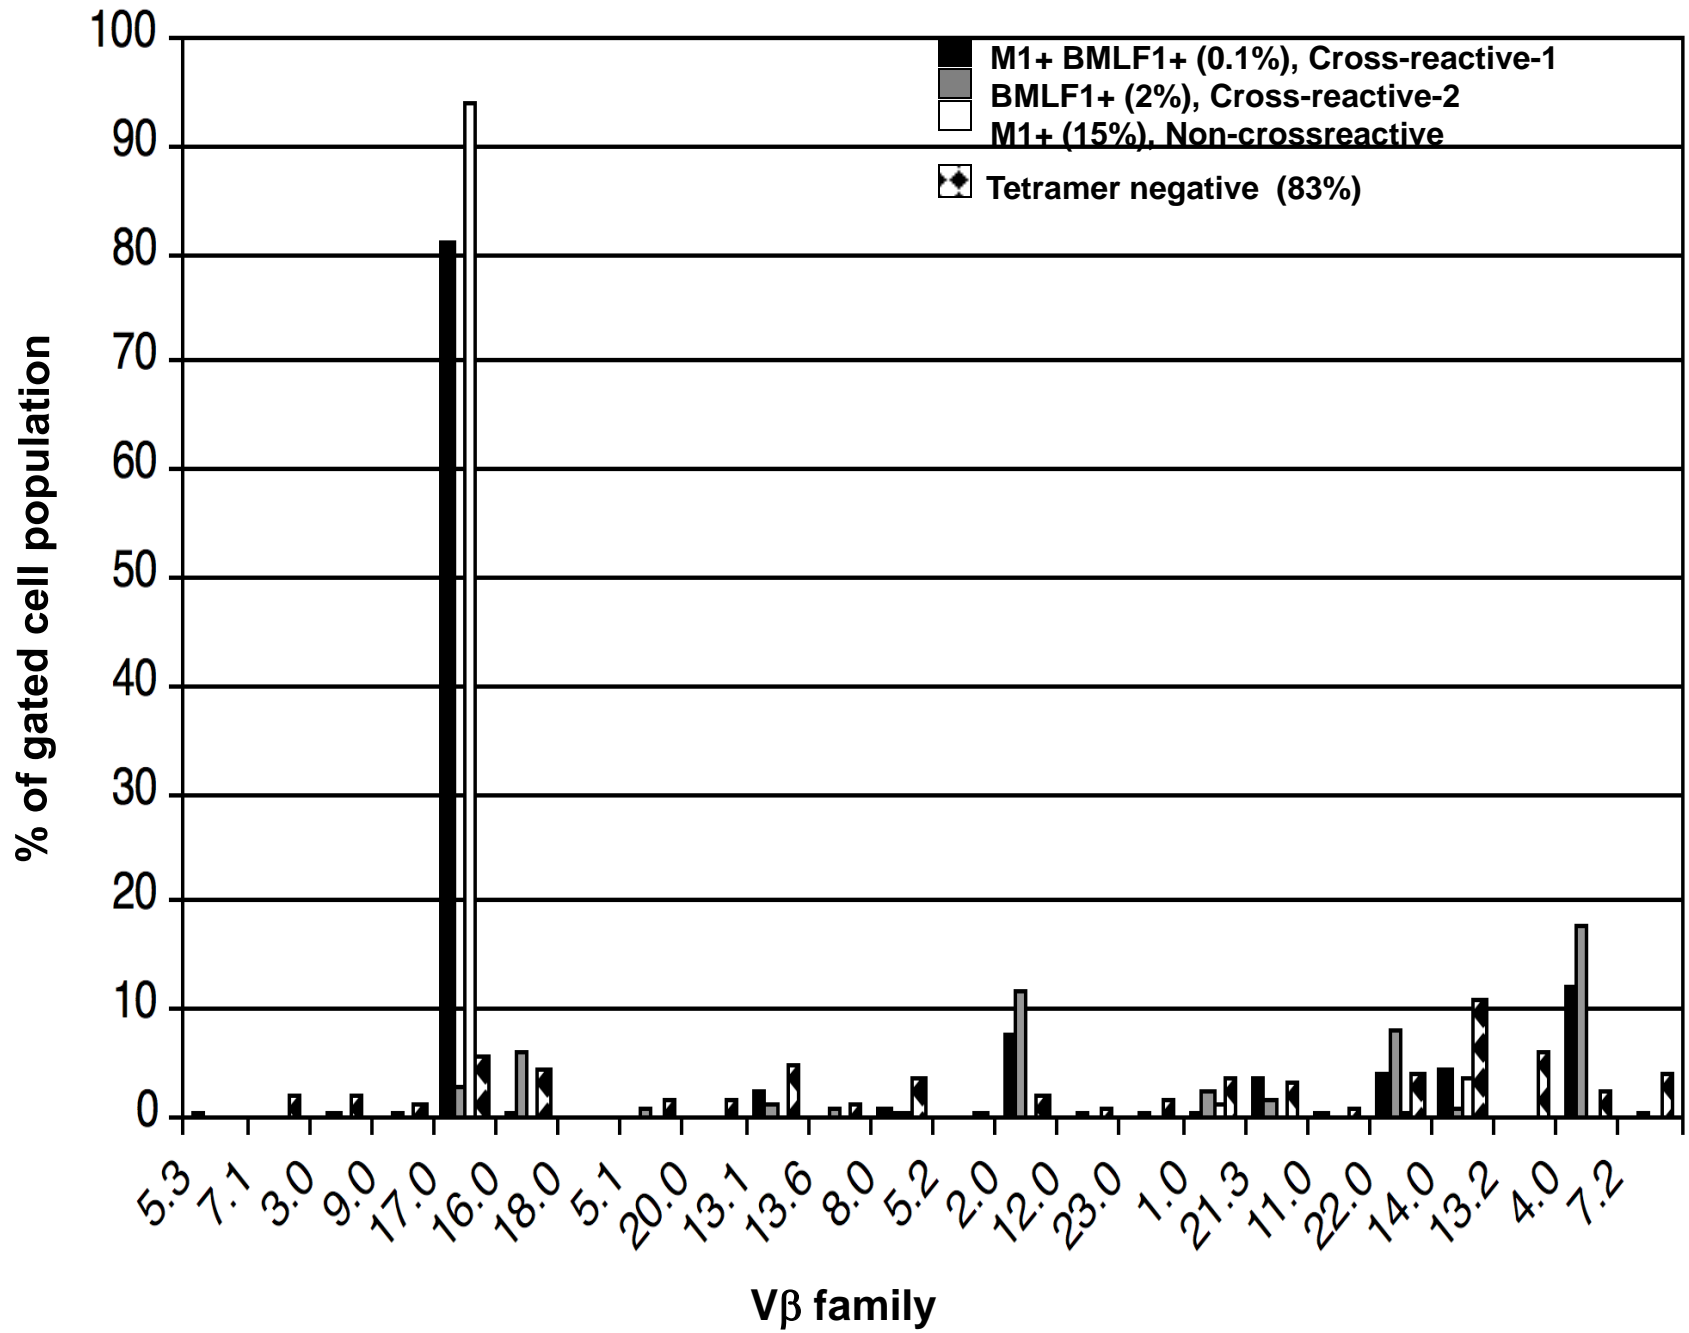

Supplemental Figure 2B

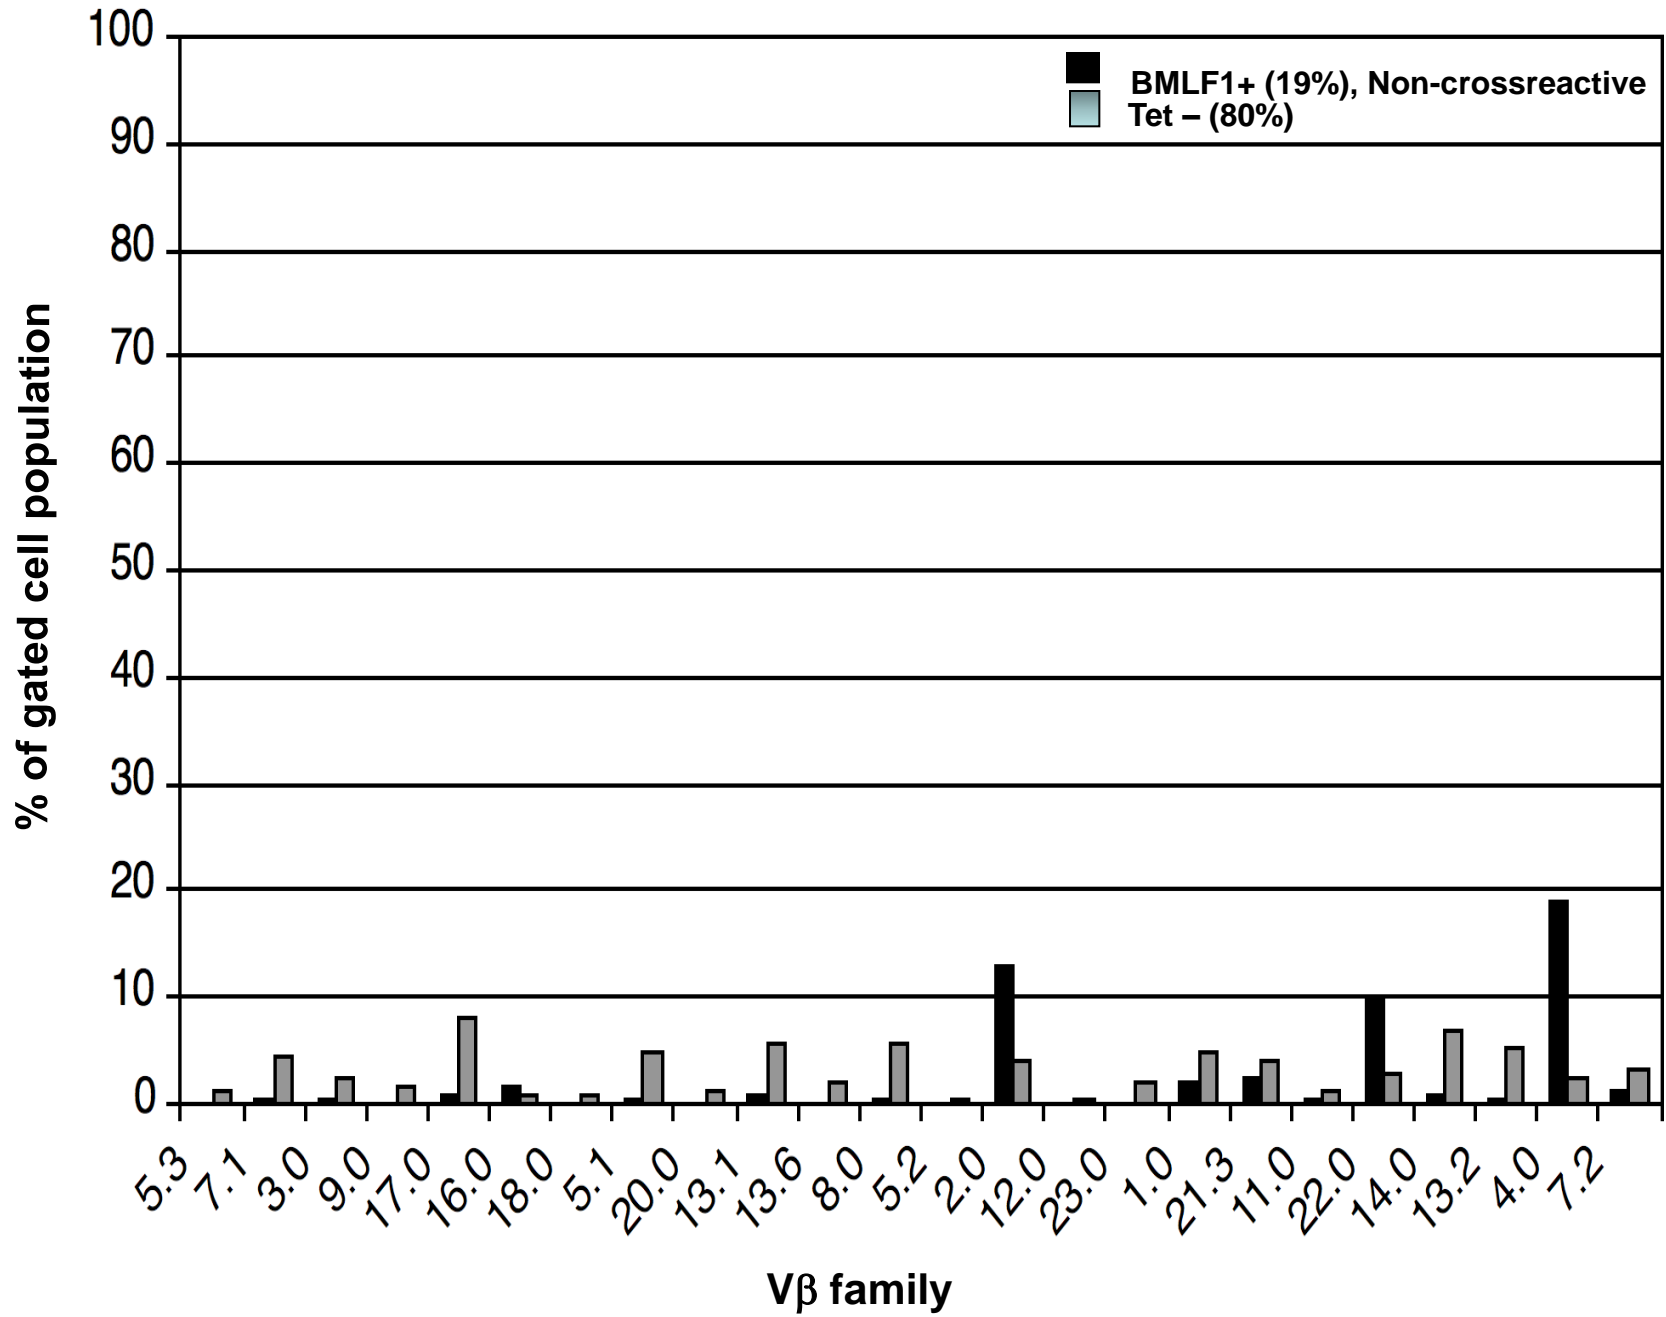

### Supplemental Figure 3

### Vb usage of CXR, MI and BMLF1

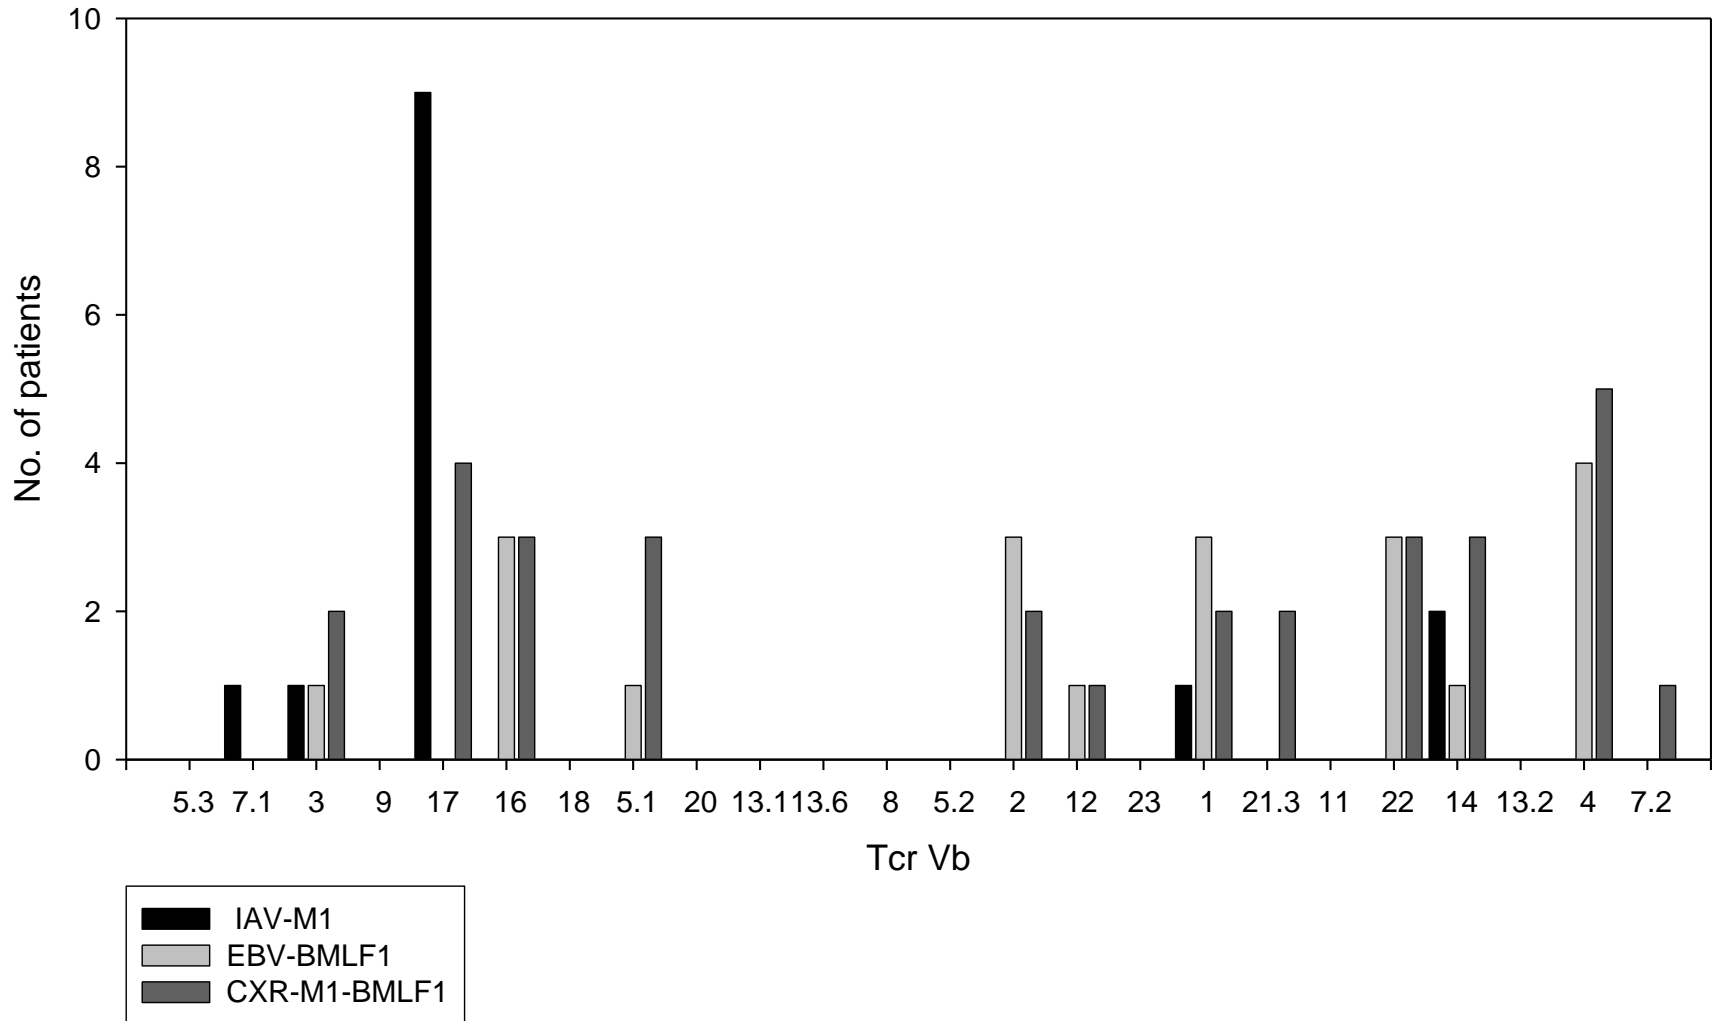

Supplemental Table 1.

Full sequences of the CDR3 of V $\beta$  and V $\alpha$  clonotypes

Figure 2:

A. Donor D-002 ex vivo BMLF1+ sequences.

| *V $\beta$                | J $\beta$ | Clonotype ID | Frequency | aa sequence CDR3 $\beta$ loop | **Length (aa) | Nucleotide sequence of V/N/D/N/J region   |
|---------------------------|-----------|--------------|-----------|-------------------------------|---------------|-------------------------------------------|
| 14                        | 1.1       | B14.1        | 1         | AS-GRNTEA-FF                  | 7             | gccagcgttcggacgaactgaagctctttt            |
| Total unique clonotypes:  |           |              | 1         |                               |               |                                           |
| Total sequences analyzed: |           |              | 42        |                               |               |                                           |
| 16                        | 2.5       | B16.2        | 19        | AS-SQSPGGTQ-YF                | 8             | gccagcagccagagtcacggggggaccagctctt        |
|                           | 2.5       | B16.86       | 11        | AS-SQSPGGTQ-YF                | 8             | gccagcagccaaagccagggggggaccagctctt        |
|                           | 2.5       | B16.85       | 7         | AS-SQSPGATQ-YF                | 8             | gccagcagccaaagccggggggaccagctctt          |
|                           | 2.5       | B16.4        | 3         | AS-SQSPGGTQ-YF                | 8             | gccagcagccagtcctccggggggaccagctctt        |
|                           | 2.5       | B16.5        | 1         | AS-SQTPGGTQ-YF                | 8             | gccagcagccagccccggggggaccagctctt          |
|                           | 2.5       | B16.6        | 1         | AS-SQSPGGTQ-YF                | 8             | gccagcagccaaatctctggggggaccagctctt        |
|                           | 1.2       | B16.3        | 1         | AS-SQSPGLE-TF                 | 8             | gccagcagccaaatctccggggggctcagctctt        |
|                           | 2.1       | B16.1        | 1         | AS-SQSPGQQ-FF                 | 8             | gccagcagccaaatcccggggggtcagctctt          |
|                           | 2.4       | B16.7        | 1         | AS-SQSPGGIQ-YF                | 8             | gccagcagccaaatcccggggggtcagctctt          |
| Total unique clonotypes:  |           |              | 9         |                               |               |                                           |
| Total sequences analyzed: |           |              | 45        |                               |               |                                           |
| 17                        | 2.7       | B17.1        | 36        | AS-SIDGTAYEQ-YF               | 9             | gccaglagtataagcgggacagcctacagcagctt       |
|                           | 2.1       | B17.12       | 1         | AS-SIDRGLINEQ-FF              | 10            | gccaglagtataagcgggacttcaatgagcagctt       |
| Total unique clonotypes:  |           |              | 2         |                               |               |                                           |
| Total sequences analyzed: |           |              | 37        |                               |               |                                           |
| 18                        | 2.7       | B18.1        | 38        | AS-SPPAESYEQ-YF               | 9             | gccagctaccacggccgagactacgagcagctt         |
| Total unique clonotypes:  |           |              | 1         |                               |               |                                           |
| Total sequences analyzed: |           |              | 38        |                               |               |                                           |
| 22                        | 2.2       | B22.1        | 17        | AS-SDGKLAPGEL-FF              | 10            | gccagcagccagcggaaactagccccgggagctgtttt    |
|                           | 2.1       | B22.4        | 12        | AS-SDGELLPNEQ-FF              | 10            | gccagcagtgagcgtgactctaccatgagcagctt       |
|                           | 2.2       | B22.2        | 7         | AS-SEGQVAPGEL-FF              | 10            | gccagcagtgaaaggtcagtgccccgggagctgtttt     |
|                           | 2.2       | B22.5        | 2         | AS-SAGEVFPGEL-FF              | 10            | gccagcagtgaggggaggtttccccgggagctgtttt     |
|                           | 2.2       | B22.6        | 1         | AS-SDGRVAPGEL-FF              | 10            | gccagcagtgagcggcaggttagctccccgggagctgtttt |
| Total unique clonotypes:  |           |              | 5         |                               |               |                                           |
| Total sequences analyzed: |           |              | 39        |                               |               |                                           |

B. Donor D-002 in vitro BMLF1+ sequences.

| *V $\beta$                | J $\beta$ | Clonotype ID | Frequency | aa sequence CDR3 $\beta$ loop | **Length (aa) | Nucleotide sequence of V/N/D/N/J region |
|---------------------------|-----------|--------------|-----------|-------------------------------|---------------|-----------------------------------------|
| 14                        | 1.1       | B14.1        | 1         | AS-GRNTEA-FF                  | 7             | gccagcgttcggacgaactgaagctctttt          |
| Total unique clonotypes:  |           |              | 1         |                               |               |                                         |
| Total sequences analyzed: |           |              | 10        |                               |               |                                         |
| 16                        | 2.1       | B16.1        | 7         | AS-S QSPG GQQ-FF              | 8             | gccagcagccaaatcccggggggtcagctctt        |
|                           | 2.5       | B16.2        | 3         | AS-S QSPG GTQ-YF              | 8             | gccagcagccagagtcacggggggaccagctctt      |
|                           | 1.2       | B16.3        | 1         | AS-S QSPG GLE-TF              | 8             | gccagcagccaaatctccgggggctcagctctt       |
| Total unique clonotypes:  |           |              | 3         |                               |               |                                         |
| Total sequences analyzed: |           |              | 11        |                               |               |                                         |
| 17                        | 2.7       | B17.1        | 88        | AS-SIDGTAYEQ-YF               | 9             | gccaglagtataagcgggacagcctacagcagctt     |
|                           | 2.1       | B17.9        | 6         | AS-SIMGNYEQ-YF                | 9             | gccaglagtataaggggggcaataatgagcagctt     |
|                           | 2.7       | B17.2        | 1         | AS-SIDGTAYEQ-YF               | 9             | gccaglagtataagcgggacagcctacagcagctt     |
|                           | 2.7       | B17.3        | 1         | AS-SIDGTAYEQ-YF               | 9             | gccaglagtataaggggacagcctacagcagctt      |
|                           | 2.7       | B17.4        | 1         | AS-SIDGTAYEQ-YF               | 9             | gccaglagtataagcgggacagcctacagcagctt     |
|                           | 2.7       | B17.5        | 1         | AS-SIDGTAYEQ-YF               | 9             | gccaglagtataagcgggacagcctacagcagctt     |
|                           | 2.7       | B17.6        | 1         | AS-SIDGAAEQ-YF                | 9             | gccaglagtataagcgggacagcctacagcagctt     |
|                           | 2.7       | B17.8        | 1         | AS-SINGTAYEQ-YF               | 9             | gccaglagtataagcgggacagcctacagcagctt     |
|                           | 1.3       | B17.10       | 1         | AS-SQSDSGYEQ-YF               | 9             | gccaglagtataagcgggacagcctacagcagctt     |
|                           | 1.2       | B17.11       | 1         | AS-SSGTARYEQ-YF               | 9             | gccaglagtataagcgggacagcctacagcagctt     |
|                           | 2.7       | B17.12       | 1         | AS-SISGTAYEQ-YF               | 9             | gccaglagtataagcgggacagcctacagcagctt     |
|                           | 2.7       | B17.7        | 2         | AS-SIPRTGAYEQ-YF              | 11            | gccaglagtataagcgggacagcctacagcagctt     |
| Total unique clonotypes:  |           |              | 12        |                               |               |                                         |
| Total sequences analyzed: |           |              | 105       |                               |               |                                         |
| 18                        | 2.7       | B18.1        | 14        | AS-SPPAESYEQ-YF               | 9             | gccagctaccacggccgagactacgagcagctt       |
| Total unique clonotypes:  |           |              | 1         |                               |               |                                         |
| Total sequences analyzed: |           |              | 14        |                               |               |                                         |
| 22                        | 2.2       | B22.1        | 9         | AS-SDGKLAPGEL-FF              | 10            | gccagcagccagcggaaactagccccgggagctgtttt  |
|                           | 2.2       | B22.2        | 8         | AS-SEGQVAPGEL-FF              | 10            | gccagcagtgaaaggtcagtgccccgggagctgtttt   |
|                           | 1.2       | B22.3        | 2         | AS-NEGAGFNYGY-TF              | 10            | gccagcagtgaaaggtcagtgccccgggagctgtttt   |
|                           | 2.1       | B22.4        | 1         | AS-SDGELLPNEQ-FF              | 10            | gccagcagtgagcgtgactctaccatgagcagctt     |
| Total unique clonotypes:  |           |              | 4         |                               |               |                                         |
| Total sequences analyzed: |           |              | 20        |                               |               |                                         |

Figure 5:

A. Donor D-002 cross-reactive sequences in an M1-specific T cell line.

| *V $\beta$                | J $\beta$ | Clonotype ID | Frequency | aa sequence CDR3 $\beta$ loop | **Length (aa) | Nucleotide sequence of V/N/D/N/J region    |
|---------------------------|-----------|--------------|-----------|-------------------------------|---------------|--------------------------------------------|
| 14                        | 1.1       | B14.1        | 16        | AS-GRNTEA-FF                  | 7             | gccagcgttcggacgaactgaagctctttt             |
|                           | 2.1       | 14.6         | 4         | AS-SSGSSGYNEQ-FF              | 11            | gccagcagctccggctctcgggttaccatgagcagctt     |
|                           | 2.1       | 14.15        | 1         | AS-SLGTSGSYNEQ-FF             | 11            | gccagcagcttttagttagcagtgaggtaccatgagcagctt |
|                           | 1.1       | 14.24        | 1         | AS-GRNTEA-FF                  | 7             | gccagcgttcggacgaactgaagctctttt             |
|                           | 2.1       | 14.28        | 1         | AS-SFGTSPYNEQ-FF              | 10            | gccagcagcttgggagctgctcaccatgagcagctt       |
| Total unique clonotypes:  |           |              | 5         |                               |               |                                            |
| Total sequences analyzed: |           |              | 23        |                               |               |                                            |
| 17                        | 2.7       | 17.3         | 4         | AS-SIRSSYEQ-YF                | 8             | gccaglagtataagagctctcagcagcagctt           |
|                           |           | 17.27        | 3         | AS-SIDGTAYEQ-YF               | 9             | gccaglagtataagcgggacagcctacagcagctt        |
|                           |           | 17.13        | 2         | AS-SIRSSYEQ-YF                | 8             | gccaglagtataagcgtctcagcagcagctt            |
|                           |           | 17.16        | 2         | AS-SVRRSYEQ-YF                | 8             | gccaglagtataagcgtctcagcagcagctt            |
|                           |           | 17.26        | 2         | AS-STRSSYEQ-YF                | 8             | gccaglagtataagcgtctcagcagcagctt            |
|                           |           | 17.21        | 2         | AS-SMRSAYEQ-YF                | 8             | gccaglagtataagcgtctcagcagcagctt            |
|                           |           | 17.6         | 1         | AS-SIRSSYEQ-YF                | 8             | gccaglagtataagcgtctcagcagcagctt            |
|                           |           | 17.12        | 1         | AS-SIRSSYEQ-YF                | 8             | gccaglagtataagcgtctcagcagcagctt            |
|                           |           | 17.20        | 1         | AS-SIRSSYEQ-YF                | 8             | gccaglagtataagcgtctcagcagcagctt            |
|                           |           | 17.5         | 1         | AS-SIRSSYEQ-YF                | 8             | gccaglagtataagcgtctcagcagcagctt            |
|                           |           | 17.28        | 1         | AS-SIRSSYEQ-YF                | 8             | gccaglagtataagcgtctcagcagcagctt            |
|                           |           | 17.32        | 1         | AS-SIRSSYEQ-YF                | 8             | gccaglagtataagcgtctcagcagcagctt            |
|                           |           | 17.36        | 1         | AS-SIRSSYEQ-YF                | 8             | gccaglagtataagcgtctcagcagcagctt            |
|                           |           | 17.39        | 1         | AS-SIRSSYEQ-YF                | 8             | gccaglagtataagcgtctcagcagcagctt            |
|                           |           | 17.49        | 1         | AS-SIRSSYEQ-YF                | 8             | gccaglagtataagcgtctcagcagcagctt            |
|                           |           | 17.57        | 1         | AS-SIRSSYEQ-YF                | 8             | gccaglagtataagcgtctcagcagcagctt            |
|                           |           | 17.62        | 1         | AS-SIRSSYEQ-YF                | 8             | gccaglagtataagcgtctcagcagcagctt            |
|                           |           | 17.8         | 1         | AS-SVRRSYEQ-YF                | 8             | gccaglagtataagcgtctcagcagcagctt            |
|                           |           | 17.30        | 1         | AS-SVRRSYEQ-YF                | 8             | gccaglagtataagcgtctcagcagcagctt            |
|                           |           | 17.37        | 1         | AS-SVRRSYEQ-YF                | 8             | gccaglagtataagcgtctcagcagcagctt            |
|                           |           | 17.38        | 1         | AS-SVRRSYEQ-YF                | 8             | gccaglagtataagcgtctcagcagcagctt            |
|                           |           | 17.43        | 1         | AS-SVRRSYEQ-YF                | 8             | gccaglagtataagcgtctcagcagcagctt            |
|                           |           | 17.54        | 1         | AS-STRSSYEQ-YF                | 8             | gccaglagtataagcgtctcagcagcagctt            |
|                           |           | 17.64        | 1         | AS-SMRSAYEQ-YF                | 8             | gccaglagtataagcgtctcagcagcagctt            |
|                           |           | 17.11        | 1         | AS-SMRSAYEQ-YF                | 8             | gccaglagtataagcgtctcagcagcagctt            |
|                           |           | 17.19        | 1         | AS-SSRSAYEQ-YF                | 8             | gccaglagtataagcgtctcagcagcagctt            |
|                           |           | 17.56        | 1         | AS-SSRSAYEQ-YF                | 8             | gccaglagtataagcgtctcagcagcagctt            |
|                           |           | 17.40        | 1         | AS-SMRAAYEQ-YF                | 8             | gccaglagtataagcgtctcagcagcagctt            |

# Supplemental Table 1 continued

|                           |       |                      |                   |                                |                                           |
|---------------------------|-------|----------------------|-------------------|--------------------------------|-------------------------------------------|
| 2.3                       | 17.2  | 2                    | AS-SKRSTDTQ-YF    | 8                              | gccagtagcaaaaggagcacagatacgcagtat         |
|                           | 17.15 | 2                    | AS-SQRSTDTQ-YF    | 8                              | gccagtagtcagaagaagcacagatacgcagtat        |
|                           | 17.10 | 1                    | AS-SPRSTDTQ-YF    | 8                              | gccagtagtcccggagcacagatacgcagtat          |
|                           | 17.29 | 1                    | AS-SPRSTDTQ-YF    | 8                              | gccagtagtcccggagcacagatacgcagtat          |
|                           | 17.24 | 1                    | AS-SGRSTDTQ-YF    | 8                              | gccagtagcgggagagcacagatacgcagtat          |
|                           | 17.65 | 1                    | AS-SGRSTDTQ-YF    | 8                              | gccagtagcgggagagcacagatacgcagtat          |
|                           | 17.50 | 1                    | AS-STRSSDTQ-YF    | 8                              | gccagtagtcccggagcacagatacgcagtat          |
|                           | 17.60 | 1                    | AS-SIRSADTQ-YF    | 8                              | gccagtagtalaaggtcggcgatacgcagtat          |
|                           | 17.33 | 1                    | AS-SIRPADTQ-YF    | 8                              | gccagtagtalaaggtcggcgatacgcagtat          |
|                           | 17.41 | 2                    | AS-SALAGPTYNEQ-FF | 11                             | gccagttccgcgtacgggaccaactacaatgagcagttctc |
| 17.31                     | 1     | AS-SIGTGEQ-FF        | 7                 | gccagtagtctgtagcaggagcagctcttc |                                           |
| 17.65                     | 1     | AS-S IETTSGSSYNEQ-FF | 13                | gccagtagtctgtagcaggagcagctcttc |                                           |
| 1.2                       | 17.48 | 2                    | AS-S IGIYGY-TF    | 7                              | gccagtagtctgtagcaggagcagctcttc            |
|                           | 17.52 | 1                    | AS-SSGSYGY-TF     | 7                              | gccagtagtctgtagcaggagcagctcttc            |
| Total unique clonotypes:  |       | 42                   |                   |                                |                                           |
| Total sequences analyzed: |       | 55                   |                   |                                |                                           |

## B. Donor D-002 non-crossreactive M1+ sequences in an M1-specific T cell line.

| *V $\beta$                | J $\beta$ | Clonotype ID | Frequency | aa sequence CDR3 $\beta$ loop | **Length (aa) | Nucleotide sequence of V/N/D/N/J region |
|---------------------------|-----------|--------------|-----------|-------------------------------|---------------|-----------------------------------------|
| 17                        | 2.7       | 43.27        | 6         | AS-SMRSSYEQ-YF                | 8             | gccagtagtalaaggtctctacgagctgacttc       |
|                           |           | 17.27        | 5         | AS-SIRSSYEQ-YF                | 8             | gccagtagtalaaggtctctacgagctgacttc       |
|                           |           | 23.27        | 3         | AS-SIRSSYEQ-YF                | 8             | gccagtagtalaaggtctctacgagctgacttc       |
|                           |           | 28.27        | 3         | AS-SIRSSYEQ-YF                | 8             | gccagtagtalaaggtctctacgagctgacttc       |
|                           |           | 6.27         | 2         | AS-SIRSSYEQ-YF                | 8             | gccagtagtalaaggtctctacgagctgacttc       |
|                           |           | 25.27        | 2         | AS-SIRSSYEQ-YF                | 8             | gccagtagtalaaggtctctacgagctgacttc       |
|                           |           | 36.27        | 2         | AS-STRSSYEQ-YF                | 8             | gccagtagtalaaggtctctacgagctgacttc       |
|                           |           | 51.27        | 2         | AS-SVRSSYEQ-YF                | 8             | gccagtagtalaaggtctctacgagctgacttc       |
|                           |           | 72.27        | 2         | AS-ALRSSYEQ-YF                | 8             | gccagtagtalaaggtctctacgagctgacttc       |
|                           |           | 73.27        | 2         | AS-SIRAAEQ-YF                 | 8             | gccagtagtalaaggtctctacgagctgacttc       |
|                           |           | 84.27        | 2         | AS-SIRSGYEQ-YF                | 8             | gccagtagtalaaggtctctacgagctgacttc       |
|                           |           | 86.27        | 2         | AS-SFRSAEQ-YF                 | 8             | gccagtagtalaaggtctctacgagctgacttc       |
|                           |           | 1.27         | 1         | AS-SIRSSYEQ-YF                | 8             | gccagtagtalaaggtctctacgagctgacttc       |
|                           |           | 3.27         | 1         | AS-SIRSSYEQ-YF                | 8             | gccagtagtalaaggtctctacgagctgacttc       |
|                           |           | 19.27        | 1         | AS-SIRSSYEQ-YF                | 8             | gccagtagtalaaggtctctacgagctgacttc       |
|                           |           | 22.27        | 1         | AS-SIRSSYEQ-YF                | 8             | gccagtagtalaaggtctctacgagctgacttc       |
|                           |           | 29.27        | 1         | AS-SIRSSYEQ-YF                | 8             | gccagtagtalaaggtctctacgagctgacttc       |
|                           |           | 35.27        | 1         | AS-STRSSYEQ-YF                | 8             | gccagtagtalaaggtctctacgagctgacttc       |
|                           |           | 38.27        | 1         | AS-STRSSYEQ-YF                | 8             | gccagtagtalaaggtctctacgagctgacttc       |
|                           |           | 39.27        | 1         | AS-STRSSYEQ-YF                | 8             | gccagtagtalaaggtctctacgagctgacttc       |
|                           |           | 40.27        | 1         | AS-STRSSYEQ-YF                | 8             | gccagtagtalaaggtctctacgagctgacttc       |
|                           |           | 41.27        | 1         | AS-STRSSYEQ-YF                | 8             | gccagtagtalaaggtctctacgagctgacttc       |
|                           |           | 49.27        | 1         | AS-SVRSSYEQ-YF                | 8             | gccagtagtalaaggtctctacgagctgacttc       |
|                           |           | 59.27        | 1         | AS-SSRSAYEQ-YF                | 8             | gccagtagtalaaggtctctacgagctgacttc       |
|                           |           | 60.27        | 1         | AS-SSRSAYEQ-YF                | 8             | gccagtagtalaaggtctctacgagctgacttc       |
|                           |           | 85.27        | 1         | AS-SMRSSYEQ-YF                | 8             | gccagtagtalaaggtctctacgagctgacttc       |
|                           |           | 91.27        | 1         | AS-SIRSSYEQ-YF                | 8             | gccagtagtalaaggtctctacgagctgacttc       |
| 2.3                       |           | 1.23         | 3         | AS-SGRSTDTQ-YF                | 8             | gccagtagtalaaggtctctacgagctgacttc       |
|                           |           | 5.23         | 1         | AS-SPRSTDTQ-YF                | 8             | gccagtagtalaaggtctctacgagctgacttc       |
|                           |           | 10.23        | 1         | AS-SSRSTDTQ-YF                | 8             | gccagtagtalaaggtctctacgagctgacttc       |
|                           |           | 16.23        | 1         | AS-SORSTDTQ-YF                | 8             | gccagtagtalaaggtctctacgagctgacttc       |
|                           |           | 18.23        | 1         | AS-SQRSTDTQ-YF                | 8             | gccagtagtalaaggtctctacgagctgacttc       |
|                           |           | 19.23        | 1         | AS-SQRSTDTQ-YF                | 8             | gccagtagtalaaggtctctacgagctgacttc       |
|                           |           | 25.23        | 1         | AS-STRSSDTQ-YF                | 8             | gccagtagtalaaggtctctacgagctgacttc       |
|                           |           | 30.23        | 1         | AS-SIRSTDTQ-YF                | 8             | gccagtagtalaaggtctctacgagctgacttc       |
|                           |           | 32.23        | 1         | AS-STRSADTQ-YF                | 8             | gccagtagtalaaggtctctacgagctgacttc       |
|                           |           | 33.23        | 1         | AS-SMRSTDTQ-YF                | 8             | gccagtagtalaaggtctctacgagctgacttc       |
| 2.1                       |           | 1.21         | 1         | AT-SGRAGVEQ-FF                | 8             | gccacctccggcggcgagggt ttagcagttcttc     |
|                           |           | 7.21         | 1         | AS-SYRSSNEQ-FF                | 8             | gccagtagtalaaggtctctacgagctgacttc       |
|                           |           | 2.21         | 2         | AS-SIGTGEQ-FF                 | 7             | gccagtagtalaaggtctctacgagctgacttc       |
| Total unique clonotypes:  |           | 40           |           |                               |               |                                         |
| Total sequences analyzed: |           | 64           |           |                               |               |                                         |

Figure 6.

## A. Donor D-002 non-crossreactive BMLF1+ sequences in an BMLF1-specific T cell line.

| *V $\alpha$               | J $\alpha$ | Clonotype ID | Frequency | aa sequence CDR3 $\alpha$ loop | **Length (aa) | Nucleotide sequence of V/N/D/N/J region |
|---------------------------|------------|--------------|-----------|--------------------------------|---------------|-----------------------------------------|
| 15                        | 45         | B1           | 38        | AE-RKGGADGL-TF                 | 8             | gcagagagaagaaggaggtgctgacggaactcacttt   |
|                           |            | B2           | 5         | AE-YSSAPKI-IF                  | 7             | gcagagtagcagaaggtctctcaagataacttt       |
|                           |            | B3           | 2         | AE-STGKLI-IF                   | 5             | gcagagtagcagaaggtctctcaagataacttt       |
|                           |            | B47          | 2         | AE-SKAL-IF                     | 5             | gcagagtagcagaaggtctctcaagataacttt       |
|                           |            | B16          | 1         | AE-SEGTA-IF                    | 6             | gcagagtagcagaaggtctctcaagataacttt       |
|                           |            | B31          | 1         | AE-YSSAPKI-IF                  | 7             | gcagagtagcagaaggtctctcaagataacttt       |
|                           |            | B38          | 1         | AE-SRGA-IF                     | 5             | gcagagtagcagaaggtctctcaagataacttt       |
| Total unique clonotypes:  |            | 7            |           |                                |               |                                         |
| Total sequences analyzed: |            | 50           |           |                                |               |                                         |

## B. Donor D-002 crossreactive sequences in an M1-specific T cell line.

| *V $\alpha$               | J $\alpha$ | Clonotype ID | Frequency | aa sequence CDR3 $\alpha$ loop | **Length (aa) | Nucleotide sequence of V/N/D/N/J region |
|---------------------------|------------|--------------|-----------|--------------------------------|---------------|-----------------------------------------|
| 15                        | 45         | B1           | 35        | AE-RKGGADGL-TF                 | 8             | gcagagagaagaaggaggtgctgacggaactcacttt   |
|                           |            | X5           | 5         | AE-STGKLI-IF                   | 5             | gcagagtagcagaaggtctctcaagataacttt       |
|                           |            | X3           | 3         | AE-LGYQKV-TF                   | 6             | gcagagtagcagaaggtctctcaagataacttt       |
|                           |            | X12          | 3         | AE-SEGTA-IF                    | 6             | gcagagtagcagaaggtctctcaagataacttt       |
|                           |            | X45          | 2         | AE-DRDSTL-TF                   | 6             | gcagagtagcagaaggtctctcaagataacttt       |
|                           |            | B16          | 1         | AE-SEGTA-IF                    | 6             | gcagagtagcagaaggtctctcaagataacttt       |
|                           |            | X23          | 1         | AE-RKGGANGL-TF                 | 8             | gcagagtagcagaaggtctctcaagataacttt       |
| Total unique clonotypes:  |            | 7            |           |                                |               |                                         |
| Total sequences analyzed: |            | 50           |           |                                |               |                                         |

## C. Donor D-002 non-crossreactive M1+ sequences in an M1-specific T cell line.

| *V $\alpha$               | J $\alpha$ | Clonotype ID | Frequency | aa sequence CDR3 $\alpha$ loop | **Length (aa) | Nucleotide sequence of V/N/D/N/J region |
|---------------------------|------------|--------------|-----------|--------------------------------|---------------|-----------------------------------------|
| 15                        | 23         | M2           | 19        | AE-DNOGKLI-IF                  | 7             | gcagagtagcagaaggtctctcaagataacttt       |
|                           |            | M1           | 6         | AE-SPSLNTGFQKLI-IF             | 11            | gcagagtagcagaaggtctctcaagataacttt       |
|                           |            | M8           | 3         | AE-SNNDM-RF                    | 5             | gcagagtagcagaaggtctctcaagataacttt       |
|                           |            | M70          | 2         | AE-PGSQGLN-IF                  | 7             | gcagagtagcagaaggtctctcaagataacttt       |
|                           |            | M25          | 1         | AE-PGSQGLN-IF                  | 7             | gcagagtagcagaaggtctctcaagataacttt       |
| Total unique clonotypes:  |            | 5            |           |                                |               |                                         |
| Total sequences analyzed: |            | 31           |           |                                |               |                                         |

Each unique clonotype is distinguished by its unique nucleotide sequence. \* TCR variable (V) region nomenclature based on Arden et al., \*\* CDR3 loop length according to Chothia et al. shown flanked by two framework regions.
