# Supplementary material
Source: PubMed Central journal article supplement (PMC3738202)
Supplement: NIHMS252564-supplement-Sup_fig_legends.pdf [file NIHMS252564-supplement-Sup_fig_legends.pdf]

**Supplemental Figure 1. *The V $\beta$  repertoire of ex vivo BMLF1-specific T cells is skewed from that of the ungated CD8 T cell population.*** CD8 T cells were isolated from the peripheral blood of donor D-002 and were immediately co-stained with BMLF1-specific tetramer and V $\beta$ -specific antibodies. The bar graph illustrates the % of BMLF1 tetramer+ cells (black bars) using each respective V $\beta$  family and compares it to the repertoire of the ungated CD8 T cell population (grey bars).

**Supplemental Figure 2. *Each tetramer-defined sub-population of a T cell line has a distinct V $\beta$  repertoire as compared to tetramer negative population.*** **a)** CD8 T cells isolated from patient E1101 were cultured for 3 weeks in the presence of M1-pulsed T2 cells before being co-stained with M1- and BMLF1-specific tetramers. Following incubation with tetramers, cells were stained with V $\beta$ -specific antibodies. Each bar graph illustrates the % of cells within its respective tetramer-defined gate that use each V $\beta$  family as compared to the tetramer negative population. **(b)** CD8 T cells isolated from patient E1101 were cultured for 3 weeks in the presence of BMLF1-pulsed T2 cells before being co-stained with M1- and BMLF1-specific tetramers. Following incubation with tetramers, cells were stained with V $\beta$ -specific antibodies. The bar graph illustrates the % of BMLF1-tetramer+ cells that use each V $\beta$  family as compared to the tetramer negative population.

**Supplemental Figure 3. *The V $\beta$  repertoire of cross-reactive cells is often comprised of multiple V $\beta$  families.*** CD8 T cells were isolated from 4 healthy donors and 5 patients with IM. CD8 T cells were cultured for 3-4 weeks in the presence of M1-pulsed T2 cells before being co-

stained with M1- and BMLF1-specific tetramers followed by V $\beta$ -specific antibodies. Three tetramer-defined gates were analyzed separately: M1+ BMLF1+ (CXR-1), M1- BMLF1+ (CXR-2), and M1+ BMLF1- (non-cross-reactive M1). CD8 T cells were cultured for 3-4 weeks in the presence of BMLF1-pulsed T2 cells before being stained with tetramers and V $\beta$ -specific antibodies. The V $\beta$  usage of M1- BMLF1+ (non-cross-reactive BMLF1) cells was assessed. This graph demonstrates the number of patients using a particular V $\beta$  in each of these subsets. The results from the two crossreactive populations were pooled.
